# Supplementary material for: Genetic Diversity Studies and Identification of Molecular and Biochemical Markers Associated with Fusarium Wilt Resistance in Cultivated Faba Bean (Vicia faba)
Source: PubMed Central journal article supplement — Plant Pathol J. 2020 Feb 1;36(1):11–28. doi: 10.5423/PPJ.OA.04.2019.0119 (PMC7012577; doi:10.5423/ppj.oa.04.2019.0119), 2020-02-01
Supplement: PPJ-36-011_Supple.pdf [file PPJ-36-011_Supple.pdf]

**Supplementary Table 1.** Primer sequences and codes used

| Primer codes |        | Sequence (5' to 3')            |
|--------------|--------|--------------------------------|
| RAPD         | B06    | 5'-GACAGACAGACAGACA-3'         |
|              | HB09   | 5'-GT GT GT GT GT GT GG-3'     |
|              | HB10   | 5'-GAG AGA GAG AGA CC-3'       |
|              | HB12   | 5'-CACCACCACGC-3'              |
|              | HB13   | 5'-GAG GAGGAG GC-3'            |
|              | HB14   | 5'-CTC CTC CTC GC-3'           |
|              | SRAP-1 | ME1                            |
| EM1          |        | 5'-GACTGCGTACGAATTAAT-3'       |
| SRAP-2       | ME2    | 5'-TGAGTCCAAACCGGAC-3'         |
|              | EM3    | 5'-GACTGCGTACGAATTGAC-3'       |
| SRAP-3       | ME3    | 5'-TGAGTCCAAACCGGAT-3'         |
|              | EM4    | 5'-GACTGCGTACGAATTTGA-3'       |
| SRAP-4       | ME4    | 5'-TGAGTCCAAACCGGAC-3'         |
|              | EM1    | 5'-GACTGCGTACGAATTAAT-3'       |
| SRAP-5       | ME4    | 5'-TGAGTCCAAACCGGAC-3'         |
|              | EM2    | 5'-GACTGCGTACGAATTTGC-3'       |
| SRAP-6       | ME1    | 5'-TGAGTCCAAACCGGAA-3'         |
|              | EM2    | 5'-GACTGCGTACGAATTTGC-3'       |
| SSR-1        | F      | 5'- GCAAGTGTTCCTACGTTGC-3'     |
|              | R      | 5'-CTCCAACGGCCATAGTAGGA-3'     |
| SSR-2        | F      | 5'-GCGCTAAGGGAAAACAAAAA -3'    |
|              | R      | 5'-AACTCCCTTGTTGTCATATGGTG-3'  |
| SSR-3        | F      | 5'-ATCCCAGACTTCATAGGGAGATAG-3' |
|              | R      | 5'-GTCTAGTCCCAGGTACAAAGAGGT-3' |
| SSR-4        | F      | 5'-TCAGGGGTAAATGCGGTATC-3'     |
|              | R      | 5'-GAATTGCTTTTTGCTTCCTCA-3'    |
| SSR-5        | F      | 5'-GGGAAACAAAATATCCCCTAATC-3'  |
|              | R      | 5'-TAATCACACACATCACACCTAGCA-3' |



**Supplementary Table 3.** Survey of the DNA fragments of the SRAP primers in sixteen faba bean genotypes

| Markers | Genotypes |      |        |           |           |            |         |        |            |           |          |          |         |        |         |        |         |          |   |
|---------|-----------|------|--------|-----------|-----------|------------|---------|--------|------------|-----------|----------|----------|---------|--------|---------|--------|---------|----------|---|
|         | No.       | M.W  | Misr-3 | Nobaria-1 | Nobaria-2 | Assiut-215 | Roomy-3 | Misr-1 | Assiut-143 | Nobaria-3 | Mariut-2 | Giza-843 | Giza-40 | Giza-2 | Sakha-1 | Wadi-5 | Sakha-4 | Roomy-80 |   |
| SRAP-1  | 1         | 984  | 0      | 0         | 0         | 1          | 1       | 0      | 0          | 0         | 1        | 0        | 0       | 1      | 0       | 0      | 0       | 0        |   |
|         | 2         | 800  | 0      | 0         | 0         | 0          | 0       | 0      | 1          | 1         | 0        | 1        | 1       | 1      | 0       | 1      | 0       | 0        |   |
|         | 3         | 748  | 0      | 0         | 0         | 0          | 0       | 0      | 1          | 0         | 0        | 0        | 0       | 0      | 0       | 0      | 0       | 0        |   |
|         | 4         | 698  | 0      | 0         | 1         | 1          | 1       | 1      | 1          | 1         | 1        | 1        | 0       | 1      | 0       | 1      | 0       | 1        |   |
|         | 5         | 645  | 0      | 0         | 0         | 0          | 0       | 0      | 0          | 0         | 0        | 0        | 1       | 0      | 1       | 0      | 1       | 0        |   |
|         | 6         | 622  | 1      | 1         | 1         | 1          | 1       | 1      | 1          | 1         | 1        | 1        | 1       | 1      | 1       | 1      | 1       | 1        | 1 |
|         | 7         | 581  | 1      | 1         | 1         | 1          | 1       | 1      | 1          | 1         | 1        | 1        | 1       | 1      | 1       | 1      | 1       | 1        | 1 |
|         | 8         | 523  | 1      | 1         | 1         | 1          | 1       | 1      | 1          | 1         | 1        | 1        | 1       | 1      | 1       | 1      | 1       | 1        | 1 |
|         | 9         | 497  | 1      | 1         | 0         | 0          | 1       | 0      | 0          | 0         | 0        | 0        | 1       | 1      | 1       | 0      | 0       | 0        | 0 |
|         | 10        | 474  | 1      | 1         | 1         | 1          | 1       | 1      | 1          | 1         | 1        | 1        | 1       | 1      | 1       | 1      | 1       | 1        | 1 |
|         | 11        | 443  | 1      | 1         | 1         | 1          | 1       | 1      | 1          | 1         | 0        | 1        | 0       | 1      | 0       | 1      | 0       | 1        | 1 |
|         | 12        | 420  | 1      | 1         | 1         | 1          | 1       | 1      | 1          | 1         | 1        | 1        | 1       | 1      | 1       | 1      | 1       | 1        | 1 |
|         | 13        | 406  | 0      | 1         | 0         | 0          | 0       | 0      | 0          | 0         | 0        | 0        | 1       | 0      | 1       | 0      | 1       | 0        | 0 |
|         | 14        | 387  | 0      | 0         | 0         | 0          | 0       | 0      | 0          | 0         | 0        | 0        | 1       | 1      | 1       | 0      | 1       | 0        | 0 |
|         | 15        | 342  | 1      | 1         | 1         | 1          | 1       | 1      | 1          | 1         | 1        | 1        | 1       | 1      | 1       | 1      | 1       | 1        | 1 |
| SRAP-2  | 1         | 1151 | 0      | 0         | 0         | 0          | 0       | 0      | 0          | 0         | 0        | 1        | 0       | 0      | 0       | 0      | 0       | 0        |   |
|         | 2         | 702  | 0      | 1         | 1         | 0          | 1       | 1      | 1          | 1         | 1        | 1        | 1       | 1      | 0       | 1      | 1       | 1        |   |
|         | 3         | 631  | 0      | 0         | 0         | 0          | 0       | 0      | 0          | 1         | 0        | 0        | 0       | 0      | 0       | 0      | 0       | 0        |   |
|         | 4         | 592  | 0      | 0         | 0         | 1          | 0       | 1      | 0          | 1         | 0        | 1        | 0       | 0      | 0       | 0      | 0       | 0        |   |
|         | 5         | 549  | 0      | 1         | 1         | 1          | 1       | 1      | 1          | 1         | 1        | 1        | 1       | 1      | 0       | 1      | 1       | 1        |   |
|         | 6         | 488  | 0      | 1         | 1         | 1          | 1       | 1      | 1          | 1         | 1        | 1        | 1       | 1      | 0       | 1      | 1       | 1        |   |
|         | 7         | 407  | 1      | 1         | 1         | 1          | 1       | 1      | 1          | 1         | 1        | 1        | 1       | 1      | 1       | 1      | 0       | 1        |   |
|         | 8         | 358  | 1      | 1         | 1         | 0          | 1       | 1      | 1          | 1         | 1        | 1        | 1       | 1      | 1       | 1      | 1       | 1        |   |
|         | 9         | 335  | 0      | 1         | 1         | 1          | 1       | 1      | 0          | 1         | 1        | 1        | 1       | 1      | 0       | 1      | 0       | 1        |   |
|         | 10        | 310  | 1      | 1         | 1         | 1          | 1       | 1      | 1          | 1         | 1        | 1        | 1       | 1      | 1       | 1      | 0       | 1        |   |
|         | 11        | 289  | 0      | 1         | 1         | 1          | 1       | 0      | 0          | 1         | 1        | 1        | 0       | 1      | 1       | 1      | 1       | 1        | 0 |
|         | 12        | 257  | 1      | 1         | 1         | 1          | 1       | 1      | 1          | 1         | 1        | 1        | 1       | 1      | 1       | 1      | 1       | 1        | 1 |
|         | 13        | 224  | 1      | 1         | 0         | 1          | 1       | 1      | 1          | 1         | 1        | 1        | 1       | 1      | 0       | 1      | 1       | 1        | 1 |
| SRAP-3  | 1         | 880  | 1      | 1         | 1         | 1          | 1       | 1      | 0          | 1         | 1        | 1        | 1       | 1      | 1       | 1      | 0       | 0        |   |
|         | 2         | 720  | 0      | 0         | 0         | 1          | 1       | 0      | 0          | 0         | 1        | 0        | 0       | 1      | 0       | 0      | 0       | 0        |   |
|         | 3         | 608  | 1      | 1         | 1         | 1          | 1       | 1      | 1          | 1         | 1        | 1        | 1       | 1      | 1       | 1      | 1       | 1        |   |
|         | 4         | 539  | 0      | 1         | 0         | 0          | 0       | 1      | 0          | 0         | 0        | 0        | 1       | 0      | 1       | 0      | 0       | 0        |   |
|         | 5         | 496  | 0      | 0         | 0         | 0          | 1       | 0      | 0          | 0         | 0        | 0        | 1       | 1      | 0       | 1      | 0       | 0        |   |
|         | 6         | 444  | 0      | 0         | 0         | 0          | 0       | 0      | 1          | 0         | 0        | 0        | 1       | 0      | 0       | 1      | 0       | 0        |   |
|         | 7         | 404  | 1      | 0         | 1         | 1          | 1       | 1      | 1          | 1         | 1        | 1        | 1       | 1      | 1       | 1      | 1       | 1        |   |
|         | 8         | 373  | 1      | 1         | 1         | 1          | 1       | 1      | 1          | 1         | 1        | 0        | 0       | 0      | 0       | 0      | 1       | 1        |   |
|         | 9         | 340  | 1      | 1         | 1         | 1          | 1       | 1      | 1          | 1         | 1        | 0        | 1       | 1      | 0       | 1      | 1       | 1        |   |
|         | 10        | 312  | 0      | 0         | 0         | 0          | 1       | 0      | 1          | 0         | 0        | 0        | 0       | 0      | 0       | 0      | 0       | 0        |   |
|         | 11        | 274  | 0      | 1         | 0         | 0          | 1       | 0      | 1          | 1         | 1        | 0        | 1       | 0      | 0       | 0      | 0       | 1        |   |
|         | 12        | 247  | 0      | 0         | 0         | 0          | 0       | 0      | 0          | 0         | 0        | 1        | 0       | 0      | 1       | 0      | 1       | 0        |   |
|         | 13        | 189  | 0      | 0         | 0         | 0          | 0       | 0      | 0          | 0         | 0        | 0        | 0       | 0      | 1       | 0      | 0       | 0        |   |
|         | 14        | 172  | 0      | 0         | 0         | 0          | 0       | 0      | 0          | 0         | 1        | 1        | 0       | 0      | 0       | 0      | 0       | 0        | 1 |



Supplementary Table 4. Survey of the DNA fragments of the ISSR primers in sixteen faba bean genotypes

| Markers | No. | M.W | Misr-3 | Nobarria-1 | Nobarria-2 | Assiut-215 | Roomy-3 | Misr-1 | Assiut-143 | Nobarria-3 | Mariut-2 | Giza-843 | Giza-40 | Giza-2 | Sakha-1 | Wadi-5 | Sakha-4 | Roomy-80 |   |
|---------|-----|-----|--------|------------|------------|------------|---------|--------|------------|------------|----------|----------|---------|--------|---------|--------|---------|----------|---|
|         |     |     | 1      | 2          | 3          | 4          | 5       | 6      | 7          | 8          | 9        | 10       | 11      | 12     | 13      | 14     | 15      | 16       |   |
| SSR-1   | 1   | 722 | 0      | 0          | 0          | 0          | 0       | 0      | 0          | 0          | 1        | 0        | 0       | 1      | 0       | 0      | 0       | 0        |   |
|         | 2   | 615 | 1      | 1          | 1          | 1          | 1       | 1      | 0          | 1          | 1        | 1        | 0       | 1      | 1       | 1      | 1       | 0        |   |
|         | 3   | 557 | 1      | 1          | 1          | 1          | 1       | 1      | 1          | 1          | 1        | 1        | 1       | 1      | 1       | 1      | 1       | 1        |   |
|         | 4   | 527 | 1      | 1          | 0          | 1          | 1       | 1      | 1          | 1          | 0        | 1        | 1       | 1      | 1       | 1      | 0       | 1        | 1 |
|         | 5   | 494 | 1      | 1          | 1          | 1          | 1       | 1      | 1          | 1          | 1        | 1        | 1       | 1      | 1       | 1      | 1       | 1        | 1 |
|         | 6   | 457 | 1      | 1          | 1          | 1          | 1       | 1      | 1          | 1          | 1        | 1        | 1       | 1      | 1       | 1      | 1       | 1        | 1 |
|         | 7   | 419 | 0      | 0          | 0          | 1          | 1       | 1      | 0          | 0          | 0        | 1        | 0       | 0      | 1       | 0      | 0       | 0        | 0 |
|         | 8   | 335 | 0      | 1          | 1          | 1          | 1       | 1      | 1          | 1          | 1        | 1        | 1       | 1      | 1       | 1      | 1       | 1        | 1 |
|         | 9   | 308 | 0      | 0          | 0          | 0          | 1       | 1      | 0          | 0          | 0        | 0        | 0       | 0      | 0       | 0      | 0       | 0        | 1 |
|         | 10  | 498 | 0      | 1          | 1          | 1          | 1       | 1      | 0          | 0          | 1        | 1        | 1       | 0      | 1       | 1      | 1       | 1        | 0 |
| SSR-2   | 1   | 396 | 1      | 1          | 1          | 0          | 1       | 1      | 1          | 1          | 1        | 1        | 1       | 1      | 0       | 1      | 1       | 1        |   |
|         | 2   | 372 | 0      | 0          | 0          | 0          | 0       | 0      | 0          | 1          | 0        | 0        | 0       | 0      | 0       | 0      | 0       | 0        |   |
|         | 3   | 350 | 0      | 0          | 0          | 1          | 0       | 1      | 0          | 1          | 0        | 0        | 0       | 0      | 0       | 0      | 0       | 0        |   |
|         | 4   | 333 | 0      | 1          | 1          | 1          | 1       | 0      | 0          | 1          | 0        | 1        | 0       | 1      | 0       | 1      | 0       | 0        |   |
|         | 5   | 313 | 1      | 1          | 1          | 1          | 1       | 1      | 1          | 1          | 1        | 1        | 1       | 1      | 0       | 1      | 1       | 1        |   |
|         | 6   | 290 | 0      | 1          | 1          | 1          | 1       | 1      | 0          | 1          | 1        | 1        | 1       | 1      | 1       | 1      | 1       | 1        |   |
|         | 7   | 248 | 1      | 1          | 1          | 0          | 1       | 1      | 1          | 1          | 1        | 1        | 1       | 1      | 1       | 1      | 1       | 1        |   |
|         | 8   | 704 | 1      | 1          | 1          | 1          | 1       | 1      | 1          | 0          | 1        | 0        | 1       | 1      | 1       | 0      | 0       | 1        |   |
|         | 9   | 466 | 1      | 1          | 1          | 1          | 1       | 1      | 1          | 1          | 1        | 1        | 1       | 1      | 1       | 1      | 1       | 1        |   |
|         | 10  | 577 | 0      | 0          | 0          | 0          | 0       | 0      | 0          | 1          | 0        | 0        | 0       | 0      | 1       | 0      | 0       | 0        |   |
|         | 11  | 493 | 1      | 1          | 0          | 1          | 1       | 1      | 1          | 1          | 1        | 0        | 0       | 1      | 1       | 0      | 1       | 0        |   |
|         | 12  | 466 | 1      | 1          | 0          | 1          | 1       | 1      | 1          | 1          | 1        | 0        | 0       | 1      | 1       | 0      | 1       | 1        |   |
| SSR-3   | 1   | 395 | 1      | 0          | 0          | 0          | 0       | 1      | 0          | 0          | 0        | 0        | 0       | 0      | 0       | 0      | 0       | 0        |   |
|         | 2   | 374 | 0      | 0          | 0          | 1          | 1       | 0      | 0          | 0          | 0        | 0        | 0       | 0      | 0       | 0      | 0       | 0        |   |
|         | 3   | 341 | 1      | 0          | 0          | 1          | 1       | 1      | 1          | 0          | 1        | 1        | 1       | 1      | 1       | 1      | 1       | 1        |   |
|         | 4   | 317 | 1      | 1          | 1          | 1          | 1       | 1      | 1          | 1          | 1        | 1        | 1       | 1      | 1       | 1      | 1       | 1        |   |
|         | 5   | 250 | 0      | 1          | 1          | 1          | 1       | 1      | 1          | 1          | 1        | 1        | 0       | 1      | 1       | 1      | 1       | 1        |   |
|         | 6   | 230 | 0      | 0          | 0          | 1          | 1       | 0      | 0          | 0          | 1        | 0        | 0       | 1      | 0       | 0      | 0       | 0        |   |
|         | 7   | 954 | 1      | 1          | 1          | 1          | 0       | 1      | 1          | 1          | 1        | 1        | 1       | 1      | 1       | 1      | 1       | 0        |   |
|         | 8   | 809 | 0      | 0          | 0          | 0          | 0       | 0      | 0          | 0          | 0        | 0        | 0       | 0      | 1       | 0      | 1       | 0        |   |
| SSR-4   | 1   | 541 | 0      | 0          | 0          | 1          | 0       | 0      | 1          | 0          | 0        | 0        | 0       | 0      | 0       | 0      | 0       | 0        |   |
|         | 2   | 474 | 1      | 1          | 1          | 1          | 0       | 1      | 1          | 1          | 1        | 1        | 1       | 1      | 1       | 1      | 1       | 0        |   |
|         | 3   | 419 | 0      | 0          | 0          | 0          | 0       | 0      | 0          | 0          | 0        | 0        | 0       | 0      | 0       | 1      | 0       | 0        |   |
|         | 4   | 373 | 1      | 1          | 1          | 1          | 1       | 1      | 1          | 1          | 1        | 0        | 0       | 0      | 1       | 1      | 1       | 1        |   |
|         | 5   | 446 | 1      | 1          | 1          | 1          | 1       | 1      | 1          | 1          | 1        | 1        | 1       | 1      | 1       | 1      | 1       | 1        |   |
|         | 6   | 409 | 1      | 1          | 1          | 1          | 1       | 1      | 1          | 1          | 1        | 1        | 1       | 1      | 1       | 1      | 1       | 1        |   |
|         | 7   | 379 | 0      | 0          | 0          | 1          | 0       | 0      | 0          | 0          | 1        | 1        | 1       | 1      | 0       | 0      | 0       | 0        |   |
| SSR-5   | 5   | 312 | 0      | 1          | 1          | 1          | 0       | 0      | 0          | 0          | 0        | 1        | 0       | 0      | 0       | 0      | 0       | 1        |   |
|         | 6   | 291 | 1      | 1          | 1          | 1          | 1       | 1      | 1          | 1          | 1        | 1        | 1       | 1      | 1       | 1      | 1       | 1        |   |
|         | 7   | 263 | 1      | 1          | 1          | 1          | 1       | 1      | 1          | 1          | 1        | 1        | 1       | 1      | 1       | 1      | 1       | 1        |   |
|         | 8   | 237 | 1      | 1          | 1          | 1          | 1       | 1      | 1          | 1          | 1        | 1        | 1       | 1      | 1       | 1      | 0       | 1        |   |
|         | 9   | 206 | 1      | 1          | 1          | 0          | 0       | 1      | 1          | 1          | 0        | 1        | 1       | 0      | 1       | 0      | 1       | 0        |   |
|         | 1   | 309 | 1      | 1          | 1          | 1          | 1       | 1      | 1          | 1          | 1        | 1        | 1       | 1      | 1       | 1      | 1       | 1        |   |
|         | 2   | 276 | 1      | 0          | 1          | 1          | 1       | 1      | 1          | 1          | 1        | 1        | 1       | 1      | 1       | 0      | 1       | 1        |   |
|         | 3   | 242 | 1      | 1          | 1          | 1          | 1       | 1      | 1          | 1          | 1        | 1        | 1       | 1      | 1       | 1      | 1       | 1        |   |
|         | 4   | 219 | 0      | 0          | 0          | 0          | 0       | 0      | 0          | 0          | 0        | 0        | 0       | 0      | 1       | 0      | 1       | 0        |   |
|         | 5   | 186 | 0      | 0          | 0          | 0          | 0       | 0      | 0          | 0          | 0        | 0        | 1       | 1      | 0       | 0      | 0       | 0        |   |
|         | 6   | 152 | 0      | 0          | 0          | 0          | 0       | 0      | 0          | 0          | 0        | 1        | 0       | 0      | 0       | 0      | 0       | 0        |   |

**Supplementary Table 5.** Genetic similarity values calculated from DNA fragments generated with ISSR, SRAP primers and combined molecular markers in sixteen faba bean genotypes

| Similarity based on ISSR primers | Misr-3 | Nobaria-1 | Nobaria-2 | Assiut-215 | Roomy-3 | Misr-1 | Assiut-143 | Nobaria-3 | Mariut-2 | Giza-843 | Giza-40 | Giza-2 | Sakha-1 | Wadi-5 | Sakha-4 | Roomy-80 |
|----------------------------------|--------|-----------|-----------|------------|---------|--------|------------|-----------|----------|----------|---------|--------|---------|--------|---------|----------|
| Misr-3                           | 1      |           |           |            |         |        |            |           |          |          |         |        |         |        |         |          |
| Nobaria-1                        | 0.818  | 1         |           |            |         |        |            |           |          |          |         |        |         |        |         |          |
| Nobaria-2                        | 0.845  | 0.904     | 1         |            |         |        |            |           |          |          |         |        |         |        |         |          |
| Assiut-215                       | 0.805  | 0.835     | 0.857     | 1          |         |        |            |           |          |          |         |        |         |        |         |          |
| Roomy-3                          | 0.778  | 0.838     | 0.861     | 0.941      | 1       |        |            |           |          |          |         |        |         |        |         |          |
| Misr-1                           | 0.852  | 0.762     | 0.794     | 0.757      | 0.754   | 1      |            |           |          |          |         |        |         |        |         |          |
| Assiut-143                       | 0.853  | 0.829     | 0.88      | 0.864      | 0.816   | 0.862  | 1          |           |          |          |         |        |         |        |         |          |
| Nobaria-3                        | 0.849  | 0.88      | 0.95      | 0.86       | 0.84    | 0.8    | 0.909      | 1         |          |          |         |        |         |        |         |          |
| Mariut-2                         | 0.806  | 0.811     | 0.886     | 0.894      | 0.95    | 0.783  | 0.842      | 0.889     | 1        |          |         |        |         |        |         |          |
| Giza-843                         | 0.836  | 0.812     | 0.865     | 0.8        | 0.827   | 0.844  | 0.817      | 0.868     | 0.827    | 1        |         |        |         |        |         |          |
| Giza-40                          | 0.844  | 0.788     | 0.845     | 0.779      | 0.806   | 0.885  | 0.853      | 0.849     | 0.806    | 0.896    | 1       |        |         |        |         |          |
| Giza-2                           | 0.827  | 0.831     | 0.878     | 0.909      | 0.892   | 0.778  | 0.835      | 0.857     | 0.916    | 0.795    | 0.8     | 1      |         |        |         |          |
| Sakha-1                          | 0.87   | 0.845     | 0.921     | 0.854      | 0.857   | 0.818  | 0.904      | 0.923     | 0.883    | 0.889    | 0.841   | 0.85   | 1       |        |         |          |
| Wadi-5                           | 0.806  | 0.875     | 0.87      | 0.773      | 0.829   | 0.847  | 0.818      | 0.845     | 0.829    | 0.892    | 0.871   | 0.795  | 0.896   | 1      |         |          |
| Sakha-4                          | 0.853  | 0.857     | 0.933     | 0.84       | 0.868   | 0.769  | 0.861      | 0.935     | 0.895    | 0.873    | 0.824   | 0.835  | 0.959   | 0.879  | 1       |          |
| Roomy-80                         | 0.866  | 0.841     | 0.892     | 0.85       | 0.853   | 0.844  | 0.93       | 0.868     | 0.853    | 0.829    | 0.866   | 0.846  | 0.917   | 0.831  | 0.873   | 1        |

| Similarity based on SRAP primers | Misr-3 | Nobaria-1 | Nobaria-2 | Assiut-215 | Roomy-3 | Misr-1 | Assiut-143 | Nobaria-3 | Mariut-2 | Giza-843 | Giza-40 | Giza-2 | Sakha-1 | Wadi-5 | Sakha-4 | Roomy-80 |
|----------------------------------|--------|-----------|-----------|------------|---------|--------|------------|-----------|----------|----------|---------|--------|---------|--------|---------|----------|
| Misr-3                           | 1      |           |           |            |         |        |            |           |          |          |         |        |         |        |         |          |
| Nobaria-1                        | 0.709  | 1         |           |            |         |        |            |           |          |          |         |        |         |        |         |          |
| Nobaria-2                        | 0.759  | 0.8       | 1         |            |         |        |            |           |          |          |         |        |         |        |         |          |
| Assiut-215                       | 0.633  | 0.8       | 0.756     | 1          |         |        |            |           |          |          |         |        |         |        |         |          |
| Roomy-3                          | 0.682  | 0.828     | 0.788     | 0.889      | 1       |        |            |           |          |          |         |        |         |        |         |          |
| Misr-1                           | 0.75   | 0.819     | 0.723     | 0.747      | 0.717   | 1      |            |           |          |          |         |        |         |        |         |          |
| Assiut-143                       | 0.72   | 0.744     | 0.698     | 0.674      | 0.737   | 0.861  | 1          |           |          |          |         |        |         |        |         |          |
| Nobaria-3                        | 0.634  | 0.86      | 0.796     | 0.817      | 0.804   | 0.814  | 0.787      | 1         |          |          |         |        |         |        |         |          |
| Mariut-2                         | 0.667  | 0.842     | 0.8       | 0.905      | 0.923   | 0.75   | 0.747      | 0.857     | 1        |          |         |        |         |        |         |          |
| Giza-843                         | 0.659  | 0.86      | 0.774     | 0.774      | 0.784   | 0.767  | 0.719      | 0.854     | 0.796    | 1        |         |        |         |        |         |          |
| Giza-40                          | 0.744  | 0.809     | 0.697     | 0.674      | 0.755   | 0.829  | 0.847      | 0.761     | 0.745    | 0.783    | 1       |        |         |        |         |          |
| Giza-2                           | 0.651  | 0.83      | 0.745     | 0.851      | 0.893   | 0.713  | 0.689      | 0.804     | 0.889    | 0.887    | 0.774   | 1      |         |        |         |          |
| Sakha-1                          | 0.684  | 0.805     | 0.759     | 0.736      | 0.729   | 0.7    | 0.675      | 0.778     | 0.761    | 0.8      | 0.744   | 0.725  | 1       |        |         |          |
| Wadi-5                           | 0.658  | 0.867     | 0.778     | 0.778      | 0.788   | 0.795  | 0.767      | 0.86      | 0.8      | 0.903    | 0.831   | 0.894  | 0.759   | 1      |         |          |
| Sakha-4                          | 0.63   | 0.81      | 0.786     | 0.714      | 0.731   | 0.727  | 0.7        | 0.759     | 0.742    | 0.759    | 0.699   | 0.705  | 0.765   | 0.786  | 1       |          |
| Roomy-80                         | 0.732  | 0.78      | 0.756     | 0.683      | 0.747   | 0.853  | 0.846      | 0.776     | 0.782    | 0.729    | 0.815   | 0.698  | 0.658   | 0.756  | 0.789   | 1        |

| Similarity based on SSR primers | Misr-3 | Nobaria-1 | Nobaria-2 | Assiut-215 | Roomy-3 | Misr-1 | Assiut-143 | Nobaria-3 | Mariut-2 | Giza-843 | Giza-40 | Giza-2 | Sakha-1 | Wadi-5 | Sakha-4 | Roomy-80 |
|---------------------------------|--------|-----------|-----------|------------|---------|--------|------------|-----------|----------|----------|---------|--------|---------|--------|---------|----------|
| Misr-3                          | 1      |           |           |            |         |        |            |           |          |          |         |        |         |        |         |          |
| Nobaria-1                       | 0.842  | 1         |           |            |         |        |            |           |          |          |         |        |         |        |         |          |
| Nobaria-2                       | 0.8    | 0.931     | 1         |            |         |        |            |           |          |          |         |        |         |        |         |          |
| Assiut-215                      | 0.742  | 0.831     | 0.794     | 1          |         |        |            |           |          |          |         |        |         |        |         |          |
| Roomy-3                         | 0.78   | 0.839     | 0.8       | 0.866      | 1       |        |            |           |          |          |         |        |         |        |         |          |
| Misr-1                          | 0.947  | 0.867     | 0.828     | 0.8        | 0.806   | 1      |            |           |          |          |         |        |         |        |         |          |
| Assiut-143                      | 0.857  | 0.847     | 0.807     | 0.781      | 0.787   | 0.881  | 1          |           |          |          |         |        |         |        |         |          |
| Nobaria-3                       | 0.828  | 0.918     | 0.915     | 0.818      | 0.825   | 0.885  | 0.833      | 1         |          |          |         |        |         |        |         |          |
| Mariut-2                        | 0.814  | 0.839     | 0.8       | 0.866      | 0.875   | 0.839  | 0.852      | 0.825     | 1        |          |         |        |         |        |         |          |
| Giza-843                        | 0.793  | 0.885     | 0.915     | 0.818      | 0.794   | 0.82   | 0.8        | 0.839     | 0.825    | 1        |         |        |         |        |         |          |
| Giza-40                         | 0.83   | 0.786     | 0.815     | 0.721      | 0.724   | 0.821  | 0.836      | 0.772     | 0.793    | 0.877    | 1       |        |         |        |         |          |
| Giza-2                          | 0.787  | 0.844     | 0.806     | 0.87       | 0.879   | 0.813  | 0.794      | 0.831     | 0.939    | 0.862    | 0.833   | 1      |         |        |         |          |
| Sakha-1                         | 0.807  | 0.833     | 0.793     | 0.769      | 0.774   | 0.833  | 0.881      | 0.82      | 0.839    | 0.787    | 0.75    | 0.781  | 1       |        |         |          |
| Wadi-5                          | 0.755  | 0.857     | 0.889     | 0.754      | 0.793   | 0.786  | 0.8        | 0.842     | 0.828    | 0.842    | 0.769   | 0.8    | 0.786   | 1      |         |          |
| Sakha-4                         | 0.862  | 0.885     | 0.847     | 0.788      | 0.825   | 0.885  | 0.867      | 0.871     | 0.857    | 0.839    | 0.807   | 0.831  | 0.918   | 0.807  | 1       |          |
| Roomy-80                        | 0.792  | 0.821     | 0.815     | 0.754      | 0.862   | 0.821  | 0.836      | 0.772     | 0.793    | 0.807    | 0.808   | 0.767  | 0.75    | 0.769  | 0.807   | 1        |



| Similarity based on combined data of ISSR, SRAP and SSR primers | Misr-3 | Nobaria-1 | Nobaria-2 | Assiut-215 | Roomy-3 | Misr-1 | Assiut-143 | Nobaria-3 | Mariut-2 | Giza-843 | Giza-40 | Giza-2 | Sakha-1 | Wadi-5 | Sakha-4 | Roomy-80 |
|-----------------------------------------------------------------|--------|-----------|-----------|------------|---------|--------|------------|-----------|----------|----------|---------|--------|---------|--------|---------|----------|
| Misr (3)                                                        | 1      |           |           |            |         |        |            |           |          |          |         |        |         |        |         |          |
| Nobaria (1)                                                     | 0.782  | 1         |           |            |         |        |            |           |          |          |         |        |         |        |         |          |
| Nobaria (2)                                                     | 0.8    | 0.869     | 1         |            |         |        |            |           |          |          |         |        |         |        |         |          |
| Assiut (215)                                                    | 0.725  | 0.821     | 0.802     | 1          |         |        |            |           |          |          |         |        |         |        |         |          |
| Roomy (3)                                                       | 0.74   | 0.834     | 0.815     | 0.9        | 1       |        |            |           |          |          |         |        |         |        |         |          |
| Misr (1)                                                        | 0.842  | 0.816     | 0.775     | 0.766      | 0.753   | 1      |            |           |          |          |         |        |         |        |         |          |
| Assiut (143)                                                    | 0.804  | 0.8       | 0.789     | 0.771      | 0.776   | 0.867  | 1          |           |          |          |         |        |         |        |         |          |
| Nobaria (3)                                                     | 0.761  | 0.882     | 0.879     | 0.833      | 0.821   | 0.829  | 0.841      | 1         |          |          |         |        |         |        |         |          |
| Mariut (2)                                                      | 0.753  | 0.831     | 0.829     | 0.891      | 0.919   | 0.785  | 0.807      | 0.86      | 1        |          |         |        |         |        |         |          |
| Giza (843)                                                      | 0.754  | 0.852     | 0.841     | 0.795      | 0.8     | 0.806  | 0.773      | 0.855     | 0.814    | 1        |         |        |         |        |         |          |
| Giza (40)                                                       | 0.8    | 0.796     | 0.776     | 0.722      | 0.763   | 0.844  | 0.846      | 0.793     | 0.777    | 0.843    | 1       |        |         |        |         |          |
| Giza (2)                                                        | 0.749  | 0.834     | 0.807     | 0.876      | 0.889   | 0.762  | 0.767      | 0.829     | 0.911    | 0.85     | 0.798   | 1      |         |        |         |          |
| Sakha (1)                                                       | 0.782  | 0.826     | 0.824     | 0.786      | 0.783   | 0.777  | 0.809      | 0.838     | 0.823    | 0.825    | 0.777   | 0.783  | 1       |        |         |          |
| Wadi (5)                                                        | 0.732  | 0.867     | 0.836     | 0.77       | 0.802   | 0.808  | 0.792      | 0.851     | 0.816    | 0.884    | 0.828   | 0.837  | 0.81    | 1      |         |          |
| Sakha (4)                                                       | 0.774  | 0.847     | 0.853     | 0.779      | 0.802   | 0.788  | 0.802      | 0.85      | 0.825    | 0.818    | 0.769   | 0.784  | 0.874   | 0.821  | 1       |          |
| Roomy (80)                                                      | 0.796  | 0.812     | 0.819     | 0.762      | 0.813   | 0.841  | 0.873      | 0.807     | 0.809    | 0.783    | 0.83    | 0.768  | 0.773   | 0.784  | 0.824   | 1        |



Supplementary Table 7. Genetic similarity values calculated from protein patterns in sixteen faba bean genotypes

|            | Misr-3 | Nobaria-1 | Nobaria-2 | Assiut-215 | Roomy-3 | Misr-1 | Assiut-143 | Nobaria-3 | Mariut-2 | Giza-843 | Giza-40 | Giza-2 | Sakha-1 | Wadi-5 | Sakha-4 | Roomy-80 |
|------------|--------|-----------|-----------|------------|---------|--------|------------|-----------|----------|----------|---------|--------|---------|--------|---------|----------|
| Misr-3     | 1      |           |           |            |         |        |            |           |          |          |         |        |         |        |         |          |
| Nobaria-1  | 0.944  | 1         |           |            |         |        |            |           |          |          |         |        |         |        |         |          |
| Nobaria-2  | 0.941  | 0.944     | 1         |            |         |        |            |           |          |          |         |        |         |        |         |          |
| Assiut-215 | 0.872  | 0.927     | 0.872     | 1          |         |        |            |           |          |          |         |        |         |        |         |          |
| Roomy-3    | 0.872  | 0.927     | 0.872     | 1          | 1       |        |            |           |          |          |         |        |         |        |         |          |
| Misr-1     | 0.971  | 0.973     | 0.914     | 0.9        | 0.9     | 1      |            |           |          |          |         |        |         |        |         |          |
| Assiut-143 | 0.971  | 0.973     | 0.914     | 0.9        | 0.9     | 1      | 1          |           |          |          |         |        |         |        |         |          |
| Nobaria-3  | 0.914  | 0.973     | 0.914     | 0.9        | 0.9     | 0.944  | 0.944      | 1         |          |          |         |        |         |        |         |          |
| Mariut-2   | 0.895  | 0.95      | 0.895     | 0.977      | 0.977   | 0.923  | 0.923      | 0.923     | 1        |          |         |        |         |        |         |          |
| Giza-843   | 0.944  | 1         | 0.944     | 0.927      | 0.927   | 0.973  | 0.973      | 0.973     | 0.95     | 1        |         |        |         |        |         |          |
| Giza-40    | 0.97   | 0.914     | 0.97      | 0.842      | 0.842   | 0.941  | 0.941      | 0.882     | 0.865    | 0.914    | 1       |        |         |        |         |          |
| Giza-2     | 0.895  | 0.95      | 0.895     | 0.977      | 0.977   | 0.923  | 0.923      | 0.923     | 1        | 0.95     | 0.865   | 1      |         |        |         |          |
| Sakha-1    | 0.944  | 1         | 0.944     | 0.927      | 0.927   | 0.973  | 0.973      | 0.973     | 0.95     | 1        | 0.914   | 0.95   | 1       |        |         |          |
| Wadi-5     | 0.944  | 1         | 0.944     | 0.927      | 0.927   | 0.973  | 0.973      | 0.973     | 0.95     | 1        | 0.914   | 0.95   | 1       | 1      |         |          |
| Sakha-4    | 0.944  | 1         | 0.944     | 0.927      | 0.927   | 0.973  | 0.973      | 0.973     | 0.95     | 1        | 0.914   | 0.95   | 1       | 1      | 1       |          |
| Roomy-80   | 1      | 0.944     | 0.941     | 0.872      | 0.872   | 0.971  | 0.971      | 0.914     | 0.895    | 0.944    | 0.97    | 0.895  | 0.944   | 0.944  | 0.944   | 1        |

**Supplementary Table 8.** Genetic similarity values calculated from combined data of molecular and biochemical markers in sixteen faba bean genotypes

|             | Misr-3 | Nobaria-1 | Nobaria-2 | Assiut-215 | Roomy-3 | Misr-1 | Assiut-143 | Nobaria-3 | Mariut-2 | Giza-843 | Giza-40 | Giza-2 | Sakha-1 | Wadi-5 | Sakha-4 | Roomy-80 |
|-------------|--------|-----------|-----------|------------|---------|--------|------------|-----------|----------|----------|---------|--------|---------|--------|---------|----------|
| Misr(3)     | 1      |           |           |            |         |        |            |           |          |          |         |        |         |        |         |          |
| Nobaria(1)  | 0.807  | 1         |           |            |         |        |            |           |          |          |         |        |         |        |         |          |
| Nobaria(2)  | 0.82   | 0.879     | 1         |            |         |        |            |           |          |          |         |        |         |        |         |          |
| Assiut(215) | 0.747  | 0.836     | 0.812     | 1          |         |        |            |           |          |          |         |        |         |        |         |          |
| Roomy(3)    | 0.76   | 0.848     | 0.823     | 0.915      | 1       |        |            |           |          |          |         |        |         |        |         |          |
| Misr(1)     | 0.862  | 0.84      | 0.795     | 0.786      | 0.776   | 1      |            |           |          |          |         |        |         |        |         |          |
| Assiut(143) | 0.829  | 0.825     | 0.806     | 0.79       | 0.794   | 0.887  | 1          |           |          |          |         |        |         |        |         |          |
| Nobaria(3)  | 0.782  | 0.895     | 0.884     | 0.842      | 0.832   | 0.846  | 0.855      | 1         |          |          |         |        |         |        |         |          |
| Mariut(2)   | 0.775  | 0.849     | 0.838     | 0.903      | 0.928   | 0.806  | 0.824      | 0.868     | 1        |          |         |        |         |        |         |          |
| Giza(843)   | 0.782  | 0.874     | 0.855     | 0.814      | 0.819   | 0.831  | 0.802      | 0.871     | 0.833    | 1        |         |        |         |        |         |          |
| Giza(40)    | 0.825  | 0.813     | 0.802     | 0.74       | 0.774   | 0.858  | 0.86       | 0.805     | 0.789    | 0.853    | 1       |        |         |        |         |          |
| Giza(2)     | 0.77   | 0.851     | 0.819     | 0.891      | 0.902   | 0.786  | 0.79       | 0.842     | 0.924    | 0.864    | 0.808   | 1      |         |        |         |          |
| Sakha(1)    | 0.807  | 0.852     | 0.84      | 0.807      | 0.804   | 0.807  | 0.833      | 0.857     | 0.841    | 0.851    | 0.797   | 0.807  | 1       |        |         |          |
| Wadi(5)     | 0.765  | 0.887     | 0.851     | 0.794      | 0.821   | 0.834  | 0.82       | 0.868     | 0.837    | 0.901    | 0.84    | 0.854  | 0.839   | 1      |         |          |
| Sakha(4)    | 0.8    | 0.87      | 0.866     | 0.801      | 0.821   | 0.817  | 0.827      | 0.867     | 0.843    | 0.845    | 0.79    | 0.809  | 0.893   | 0.849  | 1       |          |
| Roomy(80)   | 0.827  | 0.831     | 0.836     | 0.779      | 0.821   | 0.861  | 0.887      | 0.822     | 0.822    | 0.806    | 0.85    | 0.786  | 0.798   | 0.809  | 0.842   | 1        |
